# Supplementary material
Source: Springer Nature journal article supplement (https://www.springermedizin.de/resource/supplementary/12884_2012_774_MOESM2_ESM.pdf/9458600)
Supplement: MOESM2 [file 9458600]

| Barrier                                                                            | Group that Identified Barrier |                |                        |
|------------------------------------------------------------------------------------|-------------------------------|----------------|------------------------|
|                                                                                    | Health Personnel (n=11)       | Parteras (n=7) | Community Women (n=21) |
| Hospital lacks medicine, equipment and infrastructure                              |                               |                |                        |
| The indigenous population does not want to accept the help that is offered to them |                               |                |                        |
| Language barriers                                                                  |                               |                |                        |
| There is not enough diffusion of the program in indigenous communities             |                               |                |                        |
| Husbands and mothers-in-law, not pregnant women, make decisions regarding birth    |                               |                |                        |
| The women and their families do not want to be seen by a male doctor               |                               |                |                        |
| Women prefer to give birth at home                                                 |                               |                |                        |
| Time is lost in getting to the hospital                                            |                               |                |                        |
| Transportation is too expensive                                                    |                               |                |                        |
| Administrative problems within the <i>Casa Materna</i>                             |                               |                |                        |
| Lack of respect and no compensation for the TBAs                                   |                               |                |                        |
| Do not want to be away from family members during birth                            |                               |                |                        |
